# Supplementary material for: Revalorization of Microalgae Biomass for Synergistic Interaction and Sustainable Applications: Bioplastic Generation
Source: MDPI journal article supplement (doi:10.3390/md20100601), 2022-09-25
Supplement: s1 [file s1]

## Supplementary materials

**Table S1.** Phycoremediation of wastewater

| Microalgae                        | Wastewater characteristics (mg L <sup>-1</sup> ) |          |            |       | Removal (%) |            |     | Reference                  |
|-----------------------------------|--------------------------------------------------|----------|------------|-------|-------------|------------|-----|----------------------------|
|                                   | Wastewater type                                  | Nitrogen | Phosphorus | COD   | Nitrogen    | Phosphorus | COD |                            |
| <i>Chlorella vulgaris</i>         | Municipal*                                       | 63       | 8.5        | NR    | 60          | 95         | NR  | (Sousa et al., 2021)       |
|                                   | Domestic*                                        | 250      | 42         | NR    | 99          | 95         | NR  |                            |
|                                   | Textile*                                         | 247      | 22         | 1,200 | 95          | 96         | 99  | (Fazal et al., 2021)       |
|                                   | Municipal                                        | 69       | 3          | 82    | 95          | 96         | NR  | (Molazadeh et al., 2019)   |
| <i>Chlorella sorokinina</i>       | Municipal                                        | 34       | 6.1        | 211   | 91          | 97         | 93  | (Yaqoubnejad et al., 2021) |
| <i>Chlorella</i> sp.              | Soybean                                          | 519      | 130        | 19950 | 87          | 99         | 77  | (Song et al., 2020a)       |
|                                   | Soybean                                          | 106      | 23         | 5320  | 96          | 95         | 78  | (Hu et al., 2020)          |
| <i>Chlorella pyrenoidosa</i>      | Municipal                                        | 10       | 2.25       | 702   | 99          | 94         | 87  | (Kumari et al., 2021)      |
|                                   | Anaerobic food                                   | 302      | 25         | 915   | 88          | 67         | 53  | (Tan et al., 2021)         |
| <i>Chromochloris zofingiensis</i> | Palm oil mill effluent                           | 376      | 58         | 2898  | 64          | 86         | 44  | (Fernando et al., 2021)    |

|                                  |                        |      |     |       |     |     |     |                                |
|----------------------------------|------------------------|------|-----|-------|-----|-----|-----|--------------------------------|
| <i>Coelastrella</i> sp.          | Swine                  | 1550 | 35  | NR    | 62  | 77  | NR  | (Li et al., 2020)              |
| <i>Chlamydomonas reinhardtii</i> | Aquaculture            | 4.6  | 15  | NR    | 98  | 33  | NR  | (Enwereuzoh et al., 2021)      |
| <i>Haematococcus pluvialis</i>   | Palm oil mill effluent | 376  | 58  | 2898  | 50  | 69  | 50  | (Fernando et al., 2021)        |
| <i>Scenedesmus</i> sp.           | Palm oil mill effluent | 99   | 53  | 1,504 | 100 | >80 | >80 | (Mohd Udaiyappan et al., 2021) |
|                                  | Potato mill effluent   | 127  | 11  | NR    | 59  | 32  | 93  | (Yuan et al., 2021)            |
|                                  | Municipal              | 42   | 3   | 550   | >99 | >99 | NR  | (Ling et al., 2019)            |
|                                  | Brewery*               | 45   | 7   | 2100  | 79  | 98  | 85  | (Song et al., 2020b)           |
| <i>Scenedesmus dimorphus</i>     | Lactic acid*           | 651  | 28  | 12571 | 96  | 90  | 95  | (Zhang et al., 2021)           |
| <i>Scenedesmus obliquus</i>      | Domestic               | 65   | 5.5 | 250   | >99 | 83  | 70  | (Han et al., 2021)             |
| <i>Desmodesmus</i> sp.           | Piggery                | 296  | 28  | 550   | 98  | 81  | NR  | (Wang et al., 2016)            |
|                                  | Cassava                | NR   | NR  | 121   | NR  | NR  | 92  | (Z. Chen et al., 2020)         |

---

\*Synthetic wastewaters  
COD: chemical oxygen demand  
NR: data not reported
